# Supplementary material for: Comparative Life Cycle Assessment of Battery and Fuel Cell Electric Cars, Trucks and Buses
Source: Preprints.org preprint supplement (doi:10.20944/preprints202402.0906.v1), 2024-02-16
Supplement: Supplementary file 1 [file supplementary]

## Sheet: FC Production GWP
Categories	Component	GWP [kg CO2 eq. / kW FC]	Category GWP
Hydrogen Tank (80 kW)	Hydrogen Tank Production	12.9631	12.9631
Proton Exchange Membrane (1 kW)	FC Catalyst Production	22.1664	22.1664
Bipolar Plates (1 kW)	FC Bipolar Plates Production	12.5381	12.5381
Balance of Plant (1 kW)	FC Air Management Production	1.63353	11.5861
	FC Fuel management Production	0.96587
	FC Heat Management Production	0.75632
	FC Other BOP Production	4.58947
	FC Water Management Production	3.64089
Stack Components (1 kW)	FC Current collectors Production	0.0711157	2.11366
	FC End gaskets Production	0.0204
	FC Membrane Production	0.751688
	FC Gas Diffusion Layer Production	0.41073
	FC Membrane Electrode Assembley Production	0.51365
	FC Stack Endplates Production	0.14942
	FC Stack compression bands Production	0.08916
	FC Stack housing Production	0.1075
Transportation (1 kW)	FC Production transport	0.158265	0.158265
Total		61.5256

## Sheet: FC Recycling GWP
Categories	Component	GWP [kg CO2 eq. / kW FC]	Category GWP
Hydrogen Tank	Hydrogen Tank Reuse	0	0
Proton Exchange Membrane	PEM recycling	-16.7386	-16.7386
Bipolar Plates	FC Bipolar Plates Recycling	-8.45432	-8.45432
Balance of Plant	FC Other BOP Recycling	0.18459	-1.38482
	FC Air Management Recycling	-0.72325
	FC Fuel Management Recycling	-0.262941
	FC Heat Management Recycling	-0.19529
	FC Water Management Recycling	-0.38793
Stack Components	FC Current Collectors Recycling	-0.01246	0.42132
	FC End Gaskets Recycling	0.00032
	FC Gas Diffusion Layer Recycling	0.31732
	FC Stack Endplates Recycling	0.0476
	FC Stack Housing Recycling	0.07933
	FC Stack compression bands Recycling	-0.01079
Transport	FC Recycling GREET Collection and Transportation EverBatt	0.63944	0.63944
Summary		-25.517

## Sheet: FC ReCePi
	Process Step	acidification: terrestrial - terrestrial acidification potential (TAP)	climate change - global warming potential (GWP100)	ecotoxicity: freshwater - freshwater ecotoxicity potential (FETP)	ecotoxicity: marine - marine ecotoxicity potential (METP)	ecotoxicity: terrestrial - terrestrial ecotoxicity potential (TETP)	energy resources: non-renewable, fossil - fossil fuel potential (FFP)	eutrophication: freshwater - freshwater eutrophication potential (FEP)	eutrophication: marine - marine eutrophication potential (MEP)	human toxicity: carcinogenic - human toxicity potential (HTPc)	human toxicity: non-carcinogenic - human toxicity potential (HTPnc)	ionising radiation - ionising radiation potential (IRP)	land use - agricultural land occupation (LOP)	material resources: metals/minerals - surplus ore potential (SOP)	ozone depletion - ozone depletion potential (ODPinfinite)	particulate matter formation - particulate matter formation potential (PMFP)	photochemical oxidant formation: human health - photochemical oxidant formation potential: humans (HOFP)	photochemical oxidant formation: terrestrial ecosystems - photochemical oxidant formation potential: ecosystems (EOFP)	water use - water consumption potential (WCP)
	1 kW Fuel Cell System Production	-4.62452	48.5625	32.5884	43.4204	5675.19	13.1623	0.0607936	0.00467015	14.943	985.958	2.2318	6.28641	13.2852	0.000139312	-1.30564	0.51351	0.528416	0.187973
	1 kW Fuel Cell System Recycling	3.15455	-26.1546	1.48889	-1.22415	-3432.14	-8.01634	-0.0415396	-0.0011845	-10.1711	-661.456	-1.50415	-4.46053	-1.5874	-4.30071e-05	0.889935	-0.352909	-0.363189	-0.0994639
	FC Recycling Collection and Transportation	0.000805477	0.639444	0.0178754	0.0299223	11.9126	0.203193	6.65198e-05	1.72604e-05	0.00889072	0.544002	0.00268327	0.0260163	0.00277098	2.81872e-07	0.000496559	0.00101211	0.00114741	0.000959704

## Sheet: Batteries Production GWP
	GWP [kg CO2 eq. / kg Battery]							GWP [kg CO2 eq. / kWh Battery]
	Material/Process	LFP	NMC811	NMC111	NCA			Material/Process	LFP	NMC811	NMC111	NCA
	Aluminium	4.15083	3.96832	3.87148	4.03494			Aluminium	35.783	26.633	27.0733	25.5376
	Natural Gas	1.59596	2.1523	2.21454	2.16895			Natural Gas	13.7583	14.445	15.4863	13.7275
	Nickel Sulfate		2.39448	1.11276	2.38886			Nickel Sulfate	0	16.0703	7.78154	15.1194
	Lithium Hydroxide		1.11032		1.10835			Lithium Hydroxide	0	7.45181	0	7.01487
	Cobalt Sulfate		0.9332	3.46938	1.42169			Cobalt Sulfate	0	6.26309	24.2614	8.99804
	Lithium Carbonate			1.00756				Lithium Carbonate	0	0	7.04587	0
	Lithium Iron Phosphate	1.33653						Lithium Iron Phosphate	11.5218	0	0	0
	Copper	1.32843	1.47921	1.46141	1.54909			Copper	11.452	9.92758	10.2197	9.80437
	BMS	1.04397	1.26004	1.259	1.39248			BMS	8.99974	8.45664	8.8042	8.81316
	Graphite	0.84629	1.04811	0.95002	1.09871			Graphite	7.2956	7.0343	6.6435	6.95386
	Electrolyte	0.76724	0.57222	0.50497	0.50025			Electrolyte	6.61414	3.8404	3.53126	3.16614
	Electronics	0.16866	0.20769	0.20721	0.22311			Electronics	1.45397	1.39389	1.44902	1.41209
	Electricity	0.586122	2.12484	2.22261	2.14628			Electricity	5.05278	14.2607	15.5428	13.584
	Separator	0.35433	0.40578	0.45361	0.40673			Separator	3.05457	2.72336	3.1721	2.57424
	Transport	0.0574576	0.0810673	0.0817086	0.0809655			Transport	0.495324	0.544076	0.571389	0.51244
	Other	2.09187	2.2866	2.36503	2.26518			Other	18.0334	15.3463	16.5387	14.3366
	Total	14.3277	20.0242	21.1813	20.7856			Total	123.515	134.39	148.121	131.554

## Sheet: Batteries Recycling GWP Infra
Material/Process	NMC111 [kg CO2 eq. / kg Battery]		NMC811 [kg CO2 eq. / kg Battery]		NCA [kg CO2 eq. / kg Battery]		LFP [kg CO2 eq. / kg Battery]
	Hydrometallurgical	Pyrometallurgical	Hydrometallurgical	Pyrometallurgical	Hydrometallurgical	Pyrometallurgical	Hydrometallurgical	Pyrometallurgical
Transport	0.63913	0.63913	0.63913	0.63913	0.63913	0.63913	0.63913	0.63913
Electronics	0.38855	0.38855	0.38783	0.38783	0.38783	0.38783	0.39715	0.39715
Steel	-0.00309	-0.00309	-0.00288	-0.0288	-0.0028	-0.0028	-0.00406	-0.00406
Copper	-0.35663	-0.35603	-0.39186	-0.39186	-0.39601	-0.39601	-0.33649	-0.33649
Aluminium	-1.02511	-0.51874	-1.04906	-0.49558	-1.04826	-0.4889	-1.08458	-0.59587
Hydrogen Peroxide	0.53932	0.09438	0.53932		0.53932		0.53932
Sodium Hydroxide	0.47314		0.47314		0.45414		0.47314
Natural Gas	0.20137	0.20137	0.20137	0.20137	0.20137	0.20137	0.20137	0.20137
Graphite	-0.01357		-0.01553		-0.01531		-0.01342
Sulfuric Acid	-0.31861		-0.31588		-0.31861		-0.31861
Lithium Carbonate	-1.39564		-1.12581		-1.22816		-0.8653
non-Fe-Co-metals		-1.33086		-1.2056		-1.20821		-1.33086
Nickel	-1.46911	-0.44938	-2.83451	-0.86704	-3.07649	-0.94105
Cobalt	-3.47315	-3.46617	-0.85807	-0.85635	-1.38926	-1.38647
Manganese	-0.41603		-0.09881
Other	0.08661	0.17846	0.314	0.52167	0.08623	0.26797	0.08544	0.25545
Sum	-6.14282	-4.62238	-4.13762	-2.09523	-5.16688	-2.92714	-0.28691	-0.77418

## Sheet: Batteries ReCePi
	Battery Chemistry	Process Step	acidification: terrestrial - terrestrial acidification potential (TAP)	climate change - global warming potential (GWP100)	ecotoxicity: freshwater - freshwater ecotoxicity potential (FETP)	ecotoxicity: marine - marine ecotoxicity potential (METP)	ecotoxicity: terrestrial - terrestrial ecotoxicity potential (TETP)	energy resources: non-renewable, fossil - fossil fuel potential (FFP)	eutrophication: freshwater - freshwater eutrophication potential (FEP)	eutrophication: marine - marine eutrophication potential (MEP)	human toxicity: carcinogenic - human toxicity potential (HTPc)	human toxicity: non-carcinogenic - human toxicity potential (HTPnc)	ionising radiation - ionising radiation potential (IRP)	land use - agricultural land occupation (LOP)	material resources: metals/minerals - surplus ore potential (SOP)	ozone depletion - ozone depletion potential (ODPinfinite)	particulate matter formation - particulate matter formation potential (PMFP)	photochemical oxidant formation: human health - photochemical oxidant formation potential: humans (HOFP)	photochemical oxidant formation: terrestrial ecosystems - photochemical oxidant formation potential: ecosystems (EOFP)	water use - water consumption potential (WCP)
	NCA per kg Battery	Production	0.108031	20.7856	6.13584	7.75567	-12.4921	6.46838	0.0124409	0.00336311	1.40971	70.3051	1.5379	-0.330337	6.32229	5.51423e-06	0.0470971	0.0226483	0.0252967	1.82741
		Collection	0.000796888	0.63913	0.0178198	0.0298593	11.9104	0.203024	6.55958e-05	1.73898e-05	0.00882533	0.542848	0.00286506	0.0259692	0.00276931	2.81766e-07	0.000483497	0.00100609	0.00114259	0.000955849
		Dismantling	-0.262646	-0.107477	0.655871	0.788914	224.254	-0.0215699	0.000520027	-1.29835e-05	0.100256	14.2308	-0.0219387	0.116819	-0.129326	4.17558e-07	-0.0766121	0.00550147	0.00562318	-0.00722036
		Recycling Pyrometallurgy	0.115449	-3.45878	13.9365	16.7216	890.334	-2.03525	-0.00963854	-0.00312539	0.736748	-72.6451	-2.52529	1.21744	-4.44002	-1.44862e-06	0.022623	0.0288612	0.0283017	-2.47541
		Recycling Hydrometallurgy	0.115285	-5.69852	15.2456	18.287	821.537	-2.53914	-0.00842386	-0.00412588	0.648454	-10.7928	-2.49905	1.84601	-8.58149	3.8372e-07	0.019681	0.0352816	0.0348755	-2.4151
	LFP per kg Battery	Production	0.21272	14.3277	1.93331	2.80615	538.252	4.00308	0.00616684	0.000762359	1.8313	60.7293	-0.129133	0.671798	1.62979	4.87142e-06	0.0598546	0.0421788	0.0442074	0.0944097
		Collection	0.000796888	0.63913	0.0178198	0.0298593	11.9104	0.203024	6.55958e-05	1.73898e-05	0.00882533	0.542848	0.00286506	0.0259692	0.00276931	2.81766e-07	0.000483497	0.00100609	0.00114259	0.000955849
		Dismantling	-0.269406	-0.207074	0.704278	0.846355	229.456	-0.0427856	0.000498386	-1.57095e-05	0.0872832	14.5077	-0.0230969	0.118687	-0.13358	4.1045e-07	-0.0786541	0.00537803	0.00549659	-0.00794876
		Recycling Pyrometallurgy	-0.118514	-1.20624	14.4385	16.5598	-1090.7	-0.276115	-0.00464517	5.14755e-05	-0.573661	-96.7771	0.0363225	-0.841837	0.495292	-2.69844e-06	-0.0323371	-0.0226784	-0.0231725	0.0123709
		Recycling Hydrometallurgy	-0.00950231	-0.718973	17.3586	20.6015	-129.84	-0.156812	-0.000517922	-0.000582734	-0.136641	-12.0797	0.0141891	-0.0267361	-2.62637	-5.2654e-07	-0.00172895	-0.00430498	-0.00441392	0.0614184
	NMC111 per kg Battery	Production	-0.166754	21.1813	7.07426	7.76674	-2334.04	7.74101	0.0135667	0.00661499	-0.377131	15.9735	4.07982	-2.52229	10.3166	2.84314e-06	-0.0225597	-0.0390555	-0.0366154	4.32878
		Collection	0.000796888	0.63913	0.0178198	0.0298593	11.9104	0.203024	6.55958e-05	1.73898e-05	0.00882533	0.542848	0.00286506	0.0259692	0.00276931	2.81766e-07	0.000483497	0.00100609	0.00114259	0.000955849
		Dismantling	-0.263262	-0.136949	0.660524	0.794378	224.662	-0.027846	0.000510958	-1.37383e-05	0.0955641	14.2423	-0.0221684	0.116787	-0.129928	4.13302e-07	-0.076813	0.00543546	0.00555561	-0.00740194
		Recycling Pyrometallurgy	0.454228	-5.12492	9.06226	12.183	3704.25	-4.24646	-0.0135828	-0.00793794	3.0338	-13.1038	-6.34917	4.3287	-10.125	2.21255e-06	0.103306	0.112361	0.111933	-6.20166
		Recycling Hydrometallurgy	0.511799	-6.64536	11.2116	15.0302	4213.25	-4.60579	-0.0111558	-0.00901891	-4.35954	63.5366	-6.34556	5.02493	-14.8591	4.16125e-06	0.116469	0.123222	0.123002	-6.15746
	NMC811 per kg Battery	Production	0.156296	20.0242	5.46382	7.12782	419.348	6.00198	0.0114193	0.00258404	1.69358	75.7871	0.924099	0.134049	5.37094	5.82069e-06	0.0581953	0.0343129	0.0369024	1.23077
		Collection	0.000796888	0.63913	0.0178198	0.0298593	11.9104	0.203024	6.55958e-05	1.73898e-05	0.00882533	0.542848	0.00286506	0.0259692	0.00276931	2.81766e-07	0.000483497	0.00100609	0.00114259	0.000955849
		Dismantling	-0.262676	-0.114222	0.655925	0.788961	224.258	-0.0230063	0.000517739	-1.31525e-05	0.0991579	14.2279	-0.0219812	0.116766	-0.129413	4.16418e-07	-0.0766256	0.00548403	0.00560534	-0.00725919
		Recycling Pyrometallurgy	0.0281219	-2.84858	14.7228	17.3501	159.301	-1.42503	-0.00824988	-0.0019036	0.187604	-85.1326	-1.54856	0.42878	-2.81222	-2.18643e-06	0.00195552	0.00828874	0.00772155	-1.52491
		Recycling Hydrometallurgy	0.03559	-4.89097	16.1049	19.0339	162.927	-1.87721	-0.00683128	-0.00282414	-1.66181	-22.2837	-1.53805	1.07002	-6.64923	-3.52724e-07	0.0011847	0.0153823	0.0149839	-1.4644
